# Supplementary material for: Synthesis and evaluation of an 18F-labelled norbornene derivative for copper-free click chemistry reactions
Source: Royal Society of Chemistry journal article supplement (doi:10.1039/c3ob40548f), 2013-01-01
Supplement: c3ob40548f.pdf [file c3ob40548f.pdf]

## Electronic Supplementary Information

### Synthesis and Evaluation of an $^{18}\text{F}$ -Labelled Norbornene Derivative for Rapid, Copper-Free Click Chemistry Reactions

James C. Knight,<sup>a</sup> Susan Richter,<sup>a</sup> Melinda Wuest,<sup>a</sup> Jenilee D. Way,<sup>a</sup> and Frank Wuest\*<sup>a</sup>

<sup>a</sup> Department of Oncology, University of Alberta, Edmonton, AB, T6G 1Z2, Canada. Tel: +1 780 989 8150; E-mail: wuest@ualberta.ca

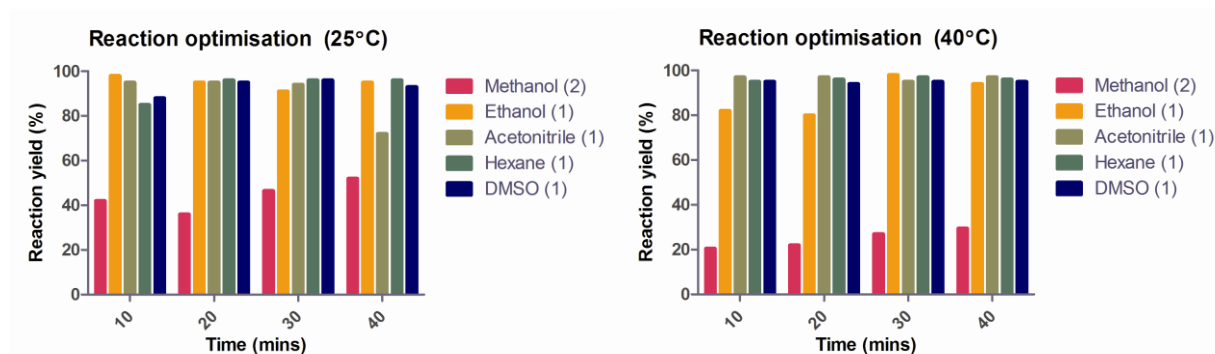

**Figure S1.** Optimisation of the reaction between [ $^{18}\text{F}$ ]SFB and 2-[(1S,2S,4S)-bicyclo[2.2.1]hept-5-en-2-yl]ethanamine using a variety of solvents at 25°C (left) and 40°C (right)

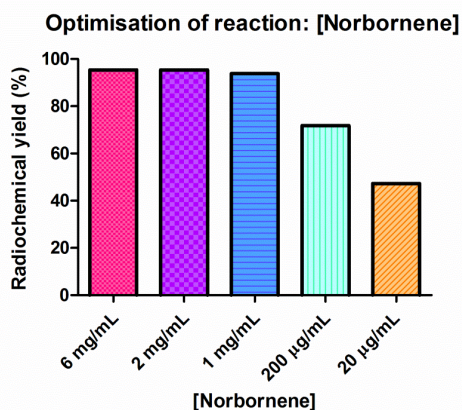

**Figure S2.** Optimisation of the reaction between [ $^{18}\text{F}$ ]SFB and 2-[(1S,2S,4S)-bicyclo[2.2.1]hept-5-en-2-yl]ethanamine in acetonitrile at 25°C

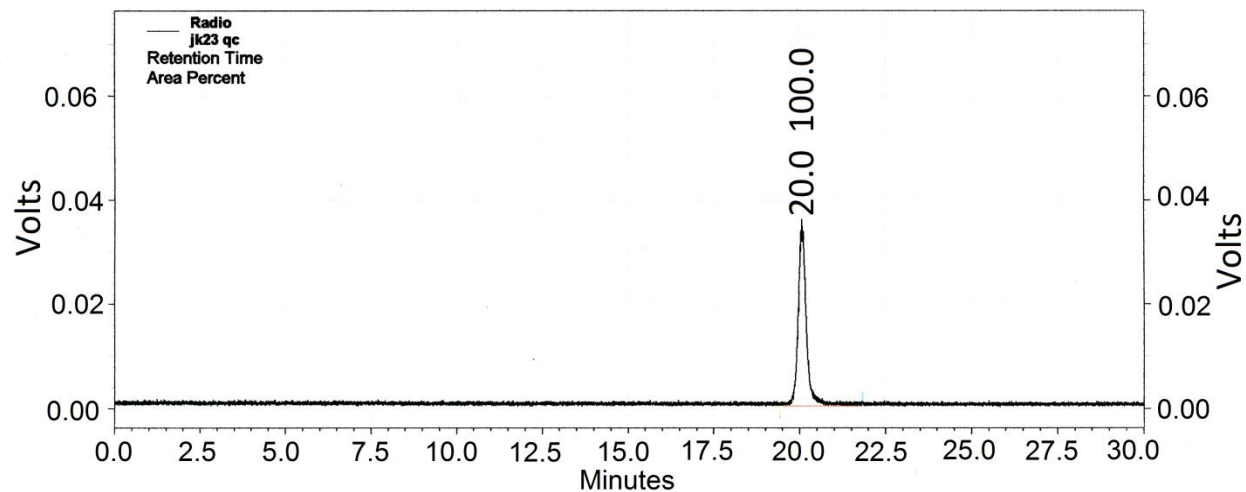

**Figure S3.** Radio-HPLC chromatograph of [ $^{18}\text{F}$ ]NFB which can be obtained in excellent radiochemical purity.

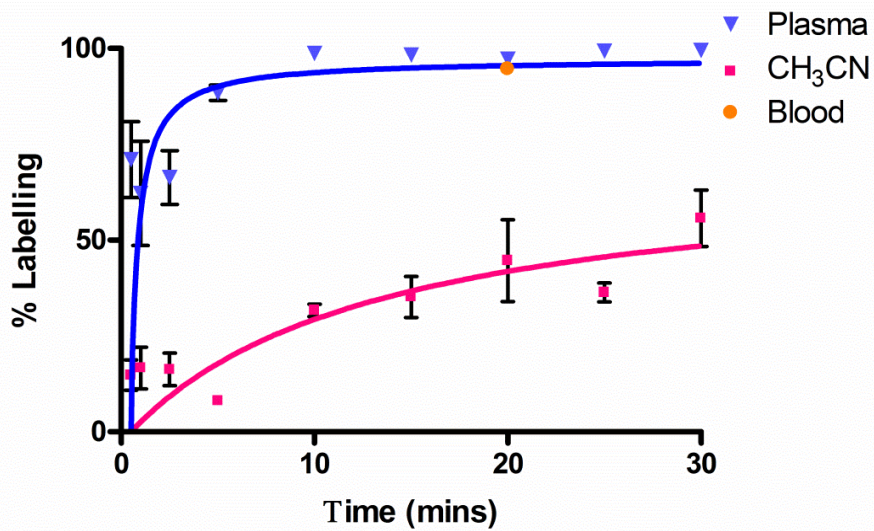

**Figure S4.** Reaction yields between [ $^{18}\text{F}$ ]NFB and Tz in acetonitrile, plasma, and blood as determined by radio-TLC over time.

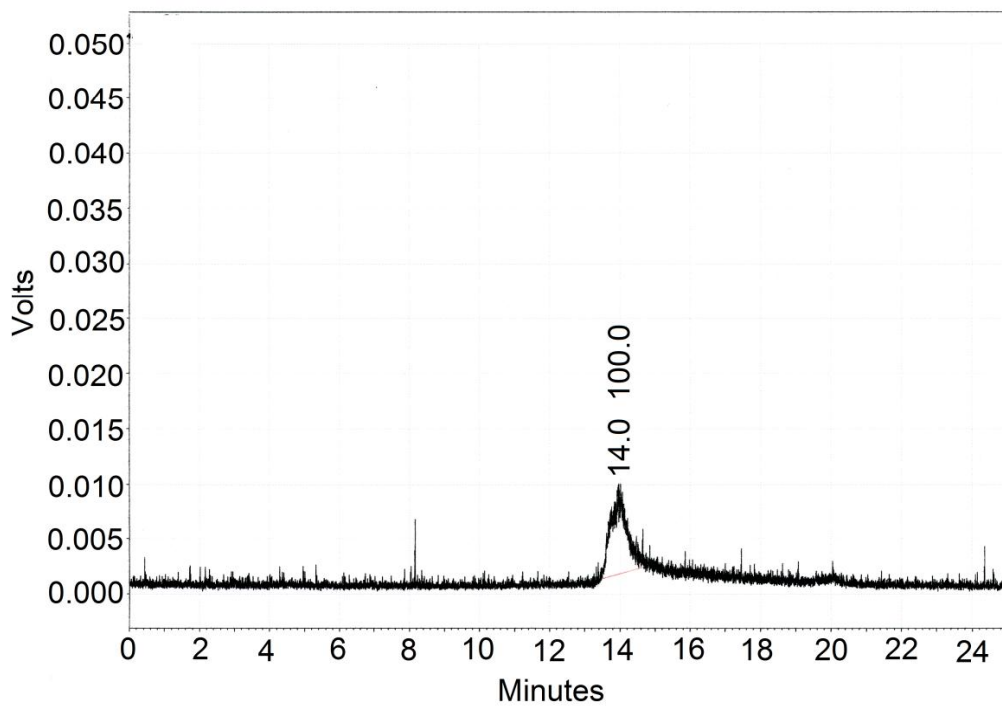

**Figure S5.** Radio-HPLC chromatograph of purified [ $^{18}\text{F}$ ]NFB-Tz after reaction in acetonitrile.

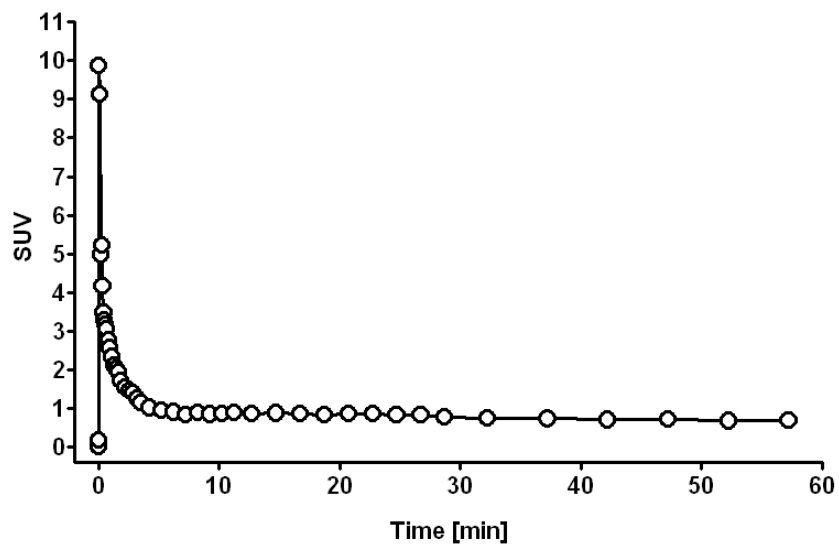

**Figure S6.** Representative time activity curve (TAC) of the blood after single administration of [ $^{18}\text{F}$ ]NFB.
